# Supplementary material
Source: bioRxiv or medRxiv preprint supplement (https://www.biorxiv.org/highwire/filestream/36657/field_highwire_adjunct_files/0/123166-1.pdf)

1 Auxotonic to Isometric Contraction Transitioning in a Beating Heart Causes Myosin Step-Size to  
2 Down Shift

3

4

5 Thomas P. Burghardt<sup>1,2,\*</sup>, Xiaojing Sun<sup>1</sup>, Yihua Wang<sup>1</sup>, and Katalin Ajtai<sup>1</sup>

6

7

8 November 2016

9 Revised January 2017

10 Revised February 2017 Accepted 12 March 2017

11

12 <sup>1</sup> Department of Biochemistry and Molecular Biology, Mayo Clinic Rochester, Rochester, MN  
13 55905

14 <sup>2</sup> Department of Physiology and Biomedical Engineering, Mayo Clinic Rochester, Rochester,  
15 MN 55905

16 \* To whom correspondence should be addressed. Email: burghardt@mayo.edu

17

18

19 Short Title: Myosin Step-Size Down Shifting in Contraction

20

21

## 22 **Abstract**

23 Myosin motors in cardiac ventriculum convert ATP free energy to the work of moving blood  
24 volume under pressure. The actin bound motor cyclically rotates its lever-arm/light-chain  
25 complex linking motor generated torque to the myosin filament backbone and translating actin  
26 against resisting force. Previous research showed that the unloaded in vitro motor is described  
27 with high precision by single molecule mechanical characteristics including unitary step-sizes of  
28 approximately 3, 5, and 8 nm and their relative step-frequencies of approximately 13, 50, and  
29 37%. The 3 and 8 nm unitary step-sizes are dependent on myosin essential light chain (ELC) N-  
30 terminus actin binding. Step-size and step-frequency quantitation specifies in vitro motor  
31 function including duty-ratio, power, and strain sensitivity metrics. In vivo, motors integrated  
32 into the muscle sarcomere form the more complex and hierarchically functioning muscle  
33 machine. The goal of the research reported here is to measure single myosin step-size and step-  
34 frequency in vivo to assess how tissue integration impacts motor function.

35 A photoactivatable GFP tags the ventriculum myosin lever-arm/light-chain complex in the  
36 beating heart of a live zebrafish embryo. Detected single GFP emission reports time-resolved  
37 myosin lever-arm orientation interpreted as step-size and step-frequency providing single myosin  
38 mechanical characteristics over the active cycle. Following step-frequency of cardiac  
39 ventriculum myosin transitioning from low to high force in relaxed to auxotonic to isometric  
40 contraction phases indicates that the imposition of resisting force during contraction causes the  
41 motor to down-shift to the 3 nm step-size accounting for >80% of all the steps in the near-  
42 isometric phase. At peak force, the ATP initiated actomyosin dissociation is the predominant  
43 strain inhibited transition in the native myosin contraction cycle. The proposed model for motor  
44 down-shifting and strain sensing involves ELC N-terminus actin binding.

45 Overall, the approach is a unique bottom-up single molecule mechanical characterization of a  
46 hierarchically functional native muscle myosin.

47

48

49

50 KEYWORDS

51 Transgenic zebrafish cardiac ventriculum

52 Single cardiac ventriculum myosin detection in vivo

53 Native cardiac myosin mechanical characteristics

54 Strain dependent cardiac myosin detachment from actin

55 In vivo zebrafish cardiac myosin step-size

56 In vivo zebrafish cardiac myosin step-frequency

57

## 58 **Introduction**

59           The myosin motor protein powers the beating heart with transduction of ATP to  
60 mechanical work. Rationalizing “bottom-up” single myosin mechanics with “top-down” whole  
61 animal muscle physiology is indispensable to solving myosin’s structure/function paradigm for  
62 creating an ensemble capable nanomotor and to providing the insight into muscle disease  
63 mechanisms demanded by translational science. A time-resolved *in vivo* imaging approach  
64 characterizes single myosin mechanics in contracting striated muscle of live zebrafish embryos.  
65 It provides the means for linking bottom-up myosin characteristics to top-down muscle  
66 physiology or phenotype in the zebrafish embryo model for human muscle.

67           The myosin transducer has a globular head (subfragment 1 or S1) and tail domain that  
68 forms myosin dimers and assembles into thick filaments. Thick filaments interdigitate with actin  
69 thin filaments in striated muscle and slide relatively during contraction [1]. S1 contains ATP and  
70 actin binding sites and a swinging lever-arm that cyclically applies tension to power filament  
71 sliding while myosin is strongly actin bound. The lever-arm converts torque generated in the  
72 motor into linear displacement (step-size) and undergoes strain due to the resisting force. Strain  
73 affects the lever-arm and the bound essential and regulatory light chains (ELC and RLC). RLC  
74 stabilizes the lever-arm [2] and disease implicated RLC mutants lower velocity, force, and strain  
75 sensitivity suggesting they alter lever-arm processing of stress [3]. The ELC N-terminus binds  
76 actin to modulate myosin functionality [4] and step-size in cardiac muscle [5].

77           In published work, we tagged human ventricular cardiac RLC (MYL2) at the C-terminus  
78 with green fluorescent protein (HCRLC-GFP) then exchanged the chimera into permeabilized  
79 skeletal [6] or cardiac papillary muscle fibers [7]. Extensively and specifically exchanged  
80 myosin in these fibers supports native isometric contraction implying the GFP tag does not affect  
81 muscle contraction. The photoactivatable variant, HCRLC-PAGFP, was individually activated in  
82 the exchanged papillary muscle fibers isolating single myosins *in situ*. Super-resolved orientation  
83 of single myosin lever-arms was measured from fibers in rigor, relaxation, and active isometric  
84 conditions. Single molecule orientation was also measured for the exchanged HCRLC-PAGFP  
85 modified by disease linked mutations to the HCRLC [3]. The exchanged mutant HCRLC  
86 lowered lever-arm stiffness and impaired lever-arm transduction/mechanical-coupling.

87           The zebrafish embryo is transparent to visible light allowing deep imaging using wide  
88 field fluorescence microscopy with highly inclined (HILO) illumination [8]. In the present work,  
89 new transgenic zebrafish were created by inserting the HCRLC-GFP or HCRLC-PAGFP gene  
90 into the zebrafish genome and using the *cmlc2* promoter to drive gene expression in the heart [9].  
91 Transgenic zebrafish embryos had visible GFP expression confined to the heart ventricle and  
92 arranged in the striated pattern characteristic to myosin in cardiac muscle fiber sarcomeres  
93 indicating specific myosin binding. Embryonic and adult transgenic zebrafish have normal heart  
94 phenotype and function. At 3-4 days post fertilization (dpf), embryos expressing HCRLC-  
95 PAGFP were imaged using HILO to detect single cardiac myosin lever-arms in the beating heart.  
96 The native embryonic heart runs with ~120 beats per min (bpm) at room temperature. We slowed  
97 heart rate to ~60 bpm using a reversible anesthetic treatment affecting nervous controlled cardiac  
98 pacing and imaged single cardiac myosins at 10 frames per second. Usually one heart cycle was  
99 quantitated in 10 sequential images. Each image acquired light for slightly less than 100 ms. This  
100 sampling rate captured and quantitated interesting mechanical features of the single functioning  
101 cardiac myosins while faster frame rates failed to provide an adequate signal to noise (S/N) ratio  
102 profile for quantitation. Control imaging experiments were also conducted on relaxed hearts  
103 temporarily stopped by a higher dose anesthetic treatment. The heart contraction cycle separated  
104 into late relaxed (diastole and full heart), auxotonic active (early systole where cardiac force  
105 exceeds load), and isometric active (late systole before ejection where cardiac force equals load)  
106 phases with distinct myosin mechanical characteristics. Comparison of single myosin mechanics  
107 in auxotonic and isometric contraction suggests a new paradigm for mechanical regulation of  
108 force/velocity.

109           Myosin mechanical functionality in vitro and at the single molecule level precisely  
110 characterizes the essential myosin structure/function paradigm but in the absence of the other  
111 motors and proteins in the muscle sarcomere. The native myosin is more complex with potential  
112 for hierarchical coordinated functionality because of its structured environment. The zebrafish  
113 embryo model system provides opportunity for single molecule mechanical characterization of a  
114 naturally integrated cardiac myosin. We measure in vivo cardiac myosin lever-arm rotation and  
115 interpret data as the step-size and step-frequency. These metrics uniquely specify native myosin  
116 functionality for an unprecedented view into how tissue integration shapes motor function.

## 117 **Materials and methods**

### 118 **A. Zebrafish sample preparations**

#### 119 **Ethics.**

120 Zebrafish embryos were produced and used in this study with approval from the Mayo  
121 Clinic Rochester Institutional Animal Care and Use Committee (protocol A47113).

122

#### 123 **Zebrafish adult ventricular cardiac myosin extraction and preparation.**

124 2-6 adult wild type (WT or Zmys) 11 month old dominant leopa zebrafish were obtained  
125 from the Mayo Clinic Zebrafish Core Facility. Fish were anesthetized for 3-5 minutes using  
126 tricaine methanesulfonate (MS-222, 168 mg/L) then euthanized. Hearts were dissected by using  
127 forceps and the ventricle placed into 1.5 ml eppendorf tubes containing 40  $\mu$ L/(5 hearts) SDS  
128 sample buffer (0.125 M Tris-HCL pH 6.8, 10% glycerol, 2% SDS, 5% <sup>2</sup>-mercaptoethanol, and  
129 0.5 mg/ml bromophenol blue). The tubes were vortexed, pelleted in the centrifuge, and heated to  
130 95 °C for 5 minutes. The pellet was homogenized by hand using a pellet pestle then incubated at  
131 room temperature for 30 min. The supernatant containing the extracted and denatured cardiac  
132 tissue proteins were heated again to 95 °C for 5 minutes and loaded to a gel or stored in the  
133 freezer at -20 °C.

134

#### 135 **Zebrafish embryo cardiac myosin extraction.**

136 Dpf 6 embryos (~80) were anesthetized for 3-5 minutes using tricaine then euthanized.  
137 Embryos were transfer into E3 water (5 mM NaCl, 0.17 mM KCl, 0.33 mM CaCl<sub>2</sub>, 0.33 mM  
138 MgSO<sub>4</sub>, 10<sup>-5</sup> % methylene blue) onto a 16-well glass slide. The hearts were dissected under the  
139 microscope using two insulin needles and excess buffer removed. We added 2-3  $\mu$ L 3% SDS  
140 sample buffer (without bromophenol blue) to each well then transferred the tissue to a 1.5 ml  
141 Eppendorf tube on ice. The tissue sample was centrifuged at low speed, denatured at 95°C for 5

142 min, sonicated for 2 min, incubated at room temperature for 30 min and then centrifuged with  
143 14000g for 10 min at 4°C. Supernatant containing solubilized protein was concentrated using ice  
144 cold 20% trichloro acetic acid (TCA) precipitation, vortexed and incubated for 30 minutes on  
145 ice, centrifuged for 30 minutes at top speed in a microcentrifuge at 4 °C then the supernatant was  
146 carefully removed to avoid disturbing the pellet. We added 0.5 ml cold acetone to the pellet to  
147 remove traces of TCA, vortexed briefly, centrifuged for 15 minutes at top speed in  
148 microcentrifuge at 4 °C, removed supernatant and dried the pellet with nitrogen gas. Dried pellet  
149 was resuspended in 2% SDS sample buffer with bromophenol blue, boiled, centrifuged at low  
150 speed to remove particulate matter, then loaded on the gel or stored at -20 °C.

151

## 152 **Transgenic animals expressing HCRLC-GFP or HCRLC-PAGFP.**

153 We coinjected transposase mRNA and plasmid containing a Tol2 construct with the  
154 zebrafish *cmlc2* enhancer and the gene for HCRLC-GFP or HCRLC-PAGFP into the cytoplasm  
155 of one-cell-stage embryos. *Cmlc2* enhancer drives HCRLC-(PA)GFP expression specifically in  
156 cardiac muscle [9]. At 3-4 dpf, we screened embryos for green fluorescence excited by 405 nm  
157 transmitted light using a 10X objective. Selected embryos exhibiting (PA)GFP expression were  
158 raised to produce F0 adults according to standard rearing protocols in the zebrafish core facility.  
159 After three months, the founder fish (F0) were screened by outcrossing with wild type. The F1  
160 embryo offspring were used for experiments or grown to maturity for an F2 generation.

161 Transgenic zebrafish had visible (PA)GFP expression confined to the heart and in the  
162 striated pattern similar to that in skeletal muscle of transiently expressed HCRLC-(PA)GFP  
163 using the *UNC-45b* enhancer [10, 11]. Wild type fish were incrossed as control and F1  
164 transgenic fish were outcrossed with wild type producing F2 embryos. F2 transgenic GFP(+) or  
165 GFP(-) (TgGFP(+) or TgGFP(-)) embryos having strong or weak (PA)GFP expression in the  
166 heart were selected at 3-4 dpf. Transgenic animals are indicated by TgGFP for either GFP or  
167 PAGFP chromophores. Single myosin imaging is always performed with the PAGFP containing  
168 isoform.

169 Embryos were usually treated with 0.5 mM 1-phenyl 2-thiourea (PTU) at 1 dpf to inhibit  
170 melanogenesis. Experiments were conducted at room temperature (20-22 °C).

171

## 172 **Cardiac functionality in zebrafish embryos.**

173 Zebrafish embryo cardiac function was estimated at 3 dpf using an ellipsoid of revolution  
174 to approximate ventricle shape with long (*a*) and short (*b*) axes measured from movies of the  
175 functioning hearts [12]. Cardiac performance was described by 4 parameters consisting of heart  
176 rate, ventricle shortening fraction (SF), ventricle end systolic (smallest) volume, and ventricle  
177 end diastolic (largest) volume. The shortening fraction measures the maximum change in *a*  
178 relative to the longest *a* over a contraction cycle. Measurements were conducted on WT and  
179 transgenic embryos with and without PTU treatment.

180

## 181 **Quantitation of HCRLC-(PA)GFP tagged myosin in zebrafish embryos.**

182 Native zebrafish cardiac ventricular regulatory light chain ZRLC and HCRLC-(PA)GFP  
183 protein expression levels were measured using SDS-PAGE of expressed and extracted proteins.  
184 Quantities of purified embryonic myosin were too low to detect quantitatively on a Sypro Ruby  
185 stained gel hence we combined Sypro Ruby staining and protein immunoblotting. Purified native  
186 adult zebrafish ventricular cardiac myosin and an *in vitro* expressed HCRLC standard were run  
187 on adjacent lanes on an SDS-PAGE gel that was stained with Sypro Ruby. Intensity for the  
188 ZRLC and HCRLC bands were compared to estimate ZRLC quantity. Protein bands from an  
189 identical gel were transferred to a membrane for Western blotting using a primary RLC antibody  
190 (1:1000 dilution, product number 10906-1-AP, Proteintech, Chicago, IL)[13]. Antibody staining  
191 of the known amounts of ZRLC and HCRLC validated and calibrated the standardized  
192 immunoblotting protocol for their detection.

193 Myosin extracted from WT, TgGFP(-), and TgGFP(+) embryos were run on adjacent  
194 lanes on an SDS-PAGE gel then the proteins were transferred to a membrane for Western  
195 blotting using the RLC antibody. Intensities of the HCRLC-(PA)GFP and ZRLC bands were



196 converted to HCRLC-(PA)GFP and ZRLC amounts and combined into the replaced fraction,  
197 ZRLC<sub>rep</sub>, given by,

$$198 \quad ZRLC_{rep} = \frac{[HCRLC - GFP]}{[HCRLC - GFP] + [ZRLC]} \quad (1)$$

199 where [...] indicates mole protein and all bands came from the TgGFP(+) embryos.  
200 Independently, the amount of ZRLC removed was measured relative to a  $\beta$ -actin loading  
201 standard in WT and transgenic embryos and using the RLC and a  $\beta$ -actin antibody (1:2000  
202 dilution, product number 4967, Cell Signaling Technology, Danvers, MA, ) [14]. The ZRLC  
203 fraction lost due to transgenesis, ZRLC<sub>rem</sub>, is given by,

$$204 \quad ZRLC_{rem} = \frac{[ZRLC]_{WT} - [ZRLC]_{TgGFP(+)}}{[ZRLC]_{WT}} \quad (2)$$

205 Experiments were conducted at room temperature (20-22 °C).

206

### 207 **Single cardiac myosin imaging in a beating heart.**

208 At 3-4 dpf, TgGFP(+) embryos were imaged to detect single cardiac myosin dynamics in  
209 the ventriculum. A TgGFP(+) embryo was placed in a 200  $\mu$ m deep microfluidic channel  
210 constructed from polydimethylsiloxane (PDMS) with the channel side up and immersed in 20  $\mu$ L  
211 of 30% Danieau Buffer (D-buffer, 17.4 mM NaCl, 0.21 mM KCl, 0.12 mM MgSO<sub>4</sub>, 0.18 mM  
212 Ca(NO<sub>3</sub>)<sub>2</sub>, 1.5 mM HEPES, pH 7.6). We introduced stepwise concentrations of tricaine, up to  
213 2000 mg/L, to reduce heart rate from 108-125 bpm to 50-60 bpm at 20 °C to facilitate single  
214 myosin imaging. Heart rate returned to normal immediately after flushing out the drug with fresh  
215 buffer and the drug cleared naturally from the embryo at  $\geq$ 10 minutes. Heart rate was monitored  
216 in a stereo microscope at high magnification. When heart rate stabilized the bathing solution  
217 volume was drawn down to  $<$ 6  $\mu$ L and the microfluidic was inverted then placed on top of a #0  
218 glass coverslip forming a water tight seal with the glass for imaging exactly as described [10].  
219 Embryos were imaged over time at a 10 Hz frame rate to collect single molecule emission  
220 images from photoactivated RLC-PAGFP. Imaging sessions were completed within 10 min.

221 Heart rate was measured visually in the microscope every 2-3 min and remained constant at 50-  
222 60 bpm over the course of the experiment. Blood circulation in capillaries in the fish tail was also  
223 monitored every 2-3 min in the microscope by visualizing blood cell movement. Blood cell flow  
224 did not qualitatively change over the course of the experiment.

225 We briefly stopped the heart by raising tricaine to 2200 mg/l in the microfluidic  
226 containing the embryo then imaged the constantly-relaxed cardiac myosin.

227

## 228 **B. *In Vivo* single myosin orientation quantitation**

### 229 **S1/GFP coordination and coordinates.**

230 The ribbon structure in **Fig 1** shows the myosin heavy chain (MHC) in blue and black,  
231 RLC and ELC binding the lever-arm in red and silver, and the GFP moiety in green. GFP is  
232 linked to the RLC C-terminus by the white linker. The S1 structure represents human  $\beta$ -cardiac  
233 myosin from homology modeling [15] of its sequence using the chicken skeletal myosin S1  
234 crystal structure 2mys [16]. The arrow indicates direction of the black section of the lever-arm  $\alpha$ -  
235 helix symmetry axis where RLC binds. The GFP chromophore in the middle of the  $\beta$ -barrel is  
236 indicated in red. The red arrow at the chromophore is the emission dipole orientation.

237

238

239

240 **Fig 1. The coordination of the GFP moiety (green) and its emission dipole moment (red**  
241 **arrow) with myosin S1 consisting of a heavy chain (blue and black), ELC (silver), and RLC**  
242 **(red).** The portion of the lever-arm in the heavy chain appearing in black is the  $\alpha$ -helix segment  
243 associated with the lever-arm orientation and depicted by the black arrow. The insert shows the  
244 time-resolved coordinates for GFP chromophore emission dipole moment in red and lever-arm  
245 helix in blue corresponding to spherical polar angles ( $\beta', \alpha'$ ) and ( $\beta, \alpha$ ) defined relative to a fiber  
246 fixed frame.

247

248

249

250           The insert has a blue arrow with embedded black  $\alpha$ -helix representing the lever-arm with  
251 coordinates  $(\beta, \alpha)$  defined relative to the unique fiber symmetry axis ( $z$ ) and arbitrary  $x$ -axis  
252 defining the fiber frame. The red arrow with embedded chromophore moiety represents the GFP  
253 chromophore emission dipole related to the lab frame by  $(\beta', \alpha')$  and referred to as probe  
254 coordinates.

255           The fiber frame  $xz$  plane in **Fig 1** lies in the microscope focal plane and in the lab frame  
256 as shown in **Fig 2**. Lab and fiber frames are related to each other by a rotation through  $\chi$  about  
257 the  $y$ -axis ( $y$ -axis not shown). Images of the heart shown in Results relate to the lab frame like  
258 the test pattern in **Fig 2**.

259

260

261 **Fig 2. The fiber frame  $xz$  plane in Fig 1 lies in the microscope focal plane and in the lab**  
262 **frame as shown.** Lab and fiber frames are related to each other by a rotation through  $\chi$ . Images  
263 of the heart shown subsequently relate to the lab frame like the image of the test pattern.

264

265

266

## 267 **Orientation super-resolution measured from tagged zebrafish muscle.**

268           Zebrafish embryos confined to the microfluidic chamber were imaged with fluorescence  
269 from the cardiac tissue as described above. Single molecule fluorescence measurements from the  
270 photoactivated HCRLC-PAGFP tagged myosin lever-arms were made on an inverted microscope  
271 using highly inclined thin illumination (HILO) excitation exactly as described [10].

272 In all fluorescence experiments, pump and observation exciting laser light polarization is  
273 p-polarized and propagating perpendicular to the long dimension of the embryo. In the heart  
274 tissue the fiber symmetry axis is not fixed but redefined for each single myosin. A sparse  
275 population of probes is photoactivated to achieve the most selective orientation distribution of  
276 photoactivated probes by using the lowest practical pump beam intensity. We identified single  
277 molecule events by their quantized intensity change due to photoactivation or photobleaching  
278 over time. Orientation super-resolution of unit vector  $\mu_e[A]$ , the *emission* dipole moment of the  
279 activated single molecule, is determined by pattern recognition exactly as described [10].

280 Raw GFP fluorescence intensity vs time from RLC-PAGFP tagged myosin *in vivo* from  
281 beating and relaxed zebrafish embryo heart ventriculum under HILO illumination is shown in  
282 **Figs A & B** in S1 File. Single myosins are identified by their quantized intensity change of ~1000  
283 photons per 0.1 second above background due to photoactivation and subsequent photobleaching  
284 to background. Photon counts indicate intensity integrated over the EMCCD camera 11x11 pixel  
285 array containing the photoactivated chromophore image. Video files for these single myosin  
286 instances are in S1-S4 Movies.

287

### 288 **S1/GFP coordination.**

289 The S1/GFP coordination of the zebrafish skeletal muscle was determined as described  
290 [10] and is shown in **Fig 1**. For the present study and using the same method, we checked the  
291 new dipole orientation data for relaxed and contracting muscle (summarized subsequently in  
292 RESULTS) for consistency with the S1/GFP coordination in **Fig 1**. We found that the new data  
293 is consistent with the previous data in selecting the S1/GFP coordination in **Fig 1** over other  
294 docked models.

295

### 296 **In vivo step-size.**

297 Single molecule images provided super-resolved orientation of the photoactivated RLC-  
298 PAGFP emission dipole in zebrafish cardiac muscle. Dipole orientations were computed from

299 images that were continuously recorded for 20-40 sec. Object spatial drift, if present, was  
300 removed by large frame image alignment prior to analysis. The time-resolved coordinates have  
301 dipole or lever-arm helix spherical polar angles ( $\beta', \alpha'$ ) or ( $\beta, \alpha$ ) defined relative to a fiber fixed  
302 frame shown in the insert to **Fig 1**. They are the trajectories for a single dipole or lever-arm helix.

303 The arc subtended by,  $\Phi$ , the angle a single lever-arm helix rotates in sequential time-  
304 correlated images defines a sequence of chords on a circle of diameter  $L$  equal to the lever-arm  
305 length indicated in **Fig 3**. Chord length is step-size,  $d$ , given by,

$$306 \quad d = 2L \sin\left(\frac{1}{2}\Phi\right) \quad (3)$$

307 Step-sizes computed by eq. 3 from many single myosin trajectories are summarized as a  
308 histogram of incremental step-lengths vs the number of observed events. Step-lengths distribute  
309 differently for various muscle physiological states. Cardiac muscle contraction separates into  
310 auxotonic and isometric phases depending on position in the heart beat cycle with the auxotonic  
311 phase early in systole when fibers are shortening but overall muscle position is relatively steady.  
312 Towards the end of systole, fiber shortening slows as force reaches isometric level and the  
313 muscle image sharpens to its peak S/N ratio.

314

315

316

317 **Fig 3. Myosin S1 consisting of a heavy chain, ELC (blue), and RLC (yellow) performing a**  
318 **powerstroke with a lever-arm rotation while strongly actin bound.** The arc subtended by,  $\Phi$ ,  
319 the angle a single lever-arm helix rotates in sequential images defines a sequence of chords on a  
320 circle of diameter  $L$  equal to the lever-arm length indicated. Chord length is step-size,  $d$ , given by  
321 eq. 3. The ELC N-terminal extension, shown actin bound at the end of the powerstroke, plays a  
322 major role in the proposed mechanism for strain sensing in the myosin.

323

324

325

326 During contraction muscle has single myosins cycling through lever-arm orientations for  
327 actin-disassociated (relaxed) and actin-associated (force generating) conformations. The  
328 relaxation phase in diastole is not identified in the beating heart cycle because the muscle  
329 translates sufficiently to leave focus. The relaxed phase is observed separately in the heart when  
330 its beat cycle is briefly interrupted by additional tricaine. Relaxed phase muscle has single  
331 myosins maintaining a mostly actin-dissociated form with statically and dynamically averaged  
332 lever-arm orientation that is non-stationary in its time sequence over sampling intervals of 100  
333 ms. Myosin develops force with its lever-arm swing starting in the high free-energy actin bound  
334 state of the myosin most closely associated with auxotonic phase. Peak force has myosin  
335 strongly actin-bound either with ADP or after ADP release (strained rigor) most closely  
336 associated with isometric phase. Both force generating phases also contain contributions from  
337 detached (relaxed) myosins and their active counterpart (isometric with auxotonic phase or  
338 auxotonic with isometric phase) due to asynchronous myosin cycling.

339 We model the step-size distribution in auxotonic and isometric phases of the heartbeat,  
340  $v_{au}$  and  $v_{is}$ , with linear combination of distributions composed of relaxed,  $v_{re}$ , and alternatively  $v_{is}$   
341 and  $\Delta v_{au}$  for the auxotonic case or  $v_{au}$  and  $\Delta v_{is}$  for the isometric case, where  $\Delta v_{au}$  and  $\Delta v_{is}$  are  
342 unknown force developing homogeneous auxotonic and isometric phases of the heartbeat,  
343 subject to constraints,

$$\begin{aligned} \Delta v_{au} &= v_{au} - c_1 v_{is} - c_2 v_{re} \\ \Delta v_{is} &= v_{is} - c_3 v_{au} - c_4 v_{re} \end{aligned} \tag{4}$$

345 for unknown constants  $c_j$ ,  $j = 1, 2, 3$ , and 4. The relaxed and active step-size histograms,  $v_{re}$ ,  $v_{is}$ ,  
346 and  $v_{au}$  are the basis vectors covering probability space spanned by tagged lever-arm  
347 orientations. They have Poisson distributed noise randomly sampled while  $\Delta v_{is}$  and  $\Delta v_{au}$  are  
348 independently minimized for each trial by selection of  $c_j$  subject to constraints  $\Delta v_{au}$ ,  $\Delta v_{is}$ , and  $c_j$   
349 all  $\geq 0$  using constrained linear programming in Mathematica. We estimate the mean and variance  
350 for  $\Delta v_{is}$  and  $\Delta v_{au}$  at each point in the histogram from the family of residuals produced in the  
351 trials.

352

### 353 **Pathway networks.**

354 Qdot assaying of porcine  $\beta$ -ventricular myosin ( $\beta$ mys) indicated three unitary steps-sizes  
355 of  $\sim 3$ ,  $\sim 5$ , and  $\sim 8$  nm with relative step frequencies of  $\sim 13$ , 50, and 37% [17]. Similar results  
356 were obtained using the assay for adult zebrafish skeletal myosin step-size and step-frequency  
357 [11]. We proposed that the major 5 nm step is the default step identical to the dominant step in  
358 skeletal myosin [18], that the 8 nm step is somewhat less likely and different from the 5 nm step  
359 by involving an extra interaction with actin via the unique N-terminus extension of ELC [4, 19-  
360 21], and that the minor 3 nm step is the unlikely conversion of the 5 nm step to the full cELC  
361 bound 8 nm step. The 3 nm step is isolated in time from the 5 nm step by slow ADP dissociation  
362 hence we sometimes observe it as a separate step [22]. We tested the N-terminus of ELC for its  
363 ability to regulate step-size and/or step-frequency using  $\beta$ mys and mouse cardiac myosin with  
364 the  $\alpha$  heavy chain ( $\alpha$ mys) including: a 17 residue N-terminal truncated ELC in porcine  
365 ventricular myosin made by papain digestion [23] and a 43 residue N-terminal truncated human  
366 ELC expressed in a transgenic mouse heart [24]. ELC N-terminus truncation caused significant  
367 redistribution in the step-frequencies among the unitary steps compared to control. An ensemble  
368 containing mainly myosin with ELC missing its N-terminus had significantly lower probability  
369 for making the 8 nm step but higher probability for the 5 nm step in both porcine  $\beta$ mys mouse  
370  $\alpha$ mys. ELC N-terminus truncation had little effect on the unitary myosin step-sizes [5].

371 The earlier in vitro work was described by a model where the 3 nm step happened only  
372 after a 5 nm step occurred. Three pathways producing 5, 8, or 5+3 nm steps describe this 3-  
373 pathway network. The present in vivo work implies that the 3 nm step can also occur  
374 independently from the 5 nm step because we observe a 3 nm step-frequency that sometimes  
375 exceeds that for 5 nm step. Four pathways producing 5, 8, 5+3, and 3 nm steps describe the new  
376 4-pathway network that is the basis for the new model discussed in RESULTS. The 4-pathway  
377 network is a superset of the 3-pathway network.

378

### 379 **Relaxed myosin lever-arm orientation dynamics.**

380 Relaxed myosin dimers in the cardiac thick filament form intra- and inter-dimer  
381 interactions thought to impact the in vivo muscle. Isolated myosin dimers exhibit the intra-dimer  
382 blocked and free head motif [25] within the hierarchical quasihelical thick filament structure  
383 [26]. The latter grants inter-dimer interactions stabilizing a globally regular but locally variable  
384 myosin 3D structure. Static variability is probably accompanied by dynamic dispersion as  
385 myosin monomers sample conformation space. We hypothesize that single myosin head  
386 dynamics observed in the relaxed zebrafish cardiac muscle results from the conformation space  
387 sampling. We estimate potential effects of conformation space sampling by using the tarantula  
388 myosin filament reconstruction (3jbh.pdb) as a model for relaxed cardiac muscle [27]. Single  
389 myosin measurements track lever-arm orientation relative to the thick filament axis using a  
390 specific region of the lever-arm helix equivalent to the black section of the human cardiac  
391 myosin lever arm in **Fig 1** (residues 808-827, tarantula sequence) that we estimate for the  
392 tarantula myosin. Thick filament axis orientation is estimated using a specific region of S2  
393 (residues 943-962, tarantula sequence). Thick filament axis orientation computed from each of  
394 the 4 myosins in the tarantula structure estimates a probability density for variability in thick  
395 filament structure that we assume single myosins sample during the course of the time-resolved  
396 lever-arm orientation measurement. We estimate the relaxed lever-arm step-size by computing  $\Phi$   
397 for lever-arm orientation relative to random variates of the thick filament structure substituting  
398 for a time-dependent trajectory.  $\Phi$ 's are converted to step-size using eq. 3 and giving a step-size  
399 histogram comparable to observation.

400



## 401 **Results**

### 402 **HCRLC-GFP stoichiometry in the zebrafish heart.**

403 We detected the ZRLC and HCRLC-GFP protein content in WT and TgGFP(+) embryo  
404 and adult zebrafish hearts using SDS-PAGE and combining Sypro Ruby staining and  
405 immunoblotting for detection of protein content. **Fig 4** shows the Sypro Ruby stained and  
406 immunoblotted SDS-PAGE gels. The Sypro Ruby gel band intensities establish ZRLC content in  
407 a zebrafish adult heart extract relative to a known amount of in vitro expressed HCRLC (**panel**  
408 **a**). These samples produce calibrated blot intensities for HCRLC and ZRLC under a standardized  
409 protein immunoblotting protocol using the RLC antibody as described in Methods and  
410 previously [11]. The standards are compared to immunoblots from HCRLC-GFP and ZRLC in  
411 WT and TgGFP(+) embryos (**panel b**) to measure relative fractions of HCRLC-GFP and ZRLC  
412 content ( $ZRLC_{rep}$ , eq. 1). The relative amount of ZRLC in WT and TgGFP(+) embryo hearts  
413 confirmed ZRLC content removed ( $ZRLC_{rem}$ , eq. 2) by their comparison to control  $\beta$ -actin  
414 expression (**panel c**) as described in Methods and previously [11]. Results agree that  $ZRLC_{rep} =$   
415  $0.63 \pm 0.04$  where error is standard deviation for  $n=6$ . Each sample size has  $\sim 80$  embryos.

416

417

418

419 **Fig 4. The Sypro Ruby stained and immunoblotted SDS-PAGE gels. The Sypro Ruby gel**  
420 **band intensities establish ZRLC content in a zebrafish adult heart extract relative to a**  
421 **known amount of in vitro expressed HCRLC (panel a).** These samples produce calibrated blot  
422 intensities for HCRLC and ZRLC under a standardized protein immunoblotting protocol using  
423 the RLC antibody as described in Methods and previously [11]. The standards are compared to  
424 immunoblots from HCRLC-GFP and ZRLC in WT and TgGFP(+) embryos (**panel b**) to  
425 measure relative fractions of HCRLC-GFP and ZRLC content ( $ZRLC_{rep}$ , eq. 1). The relative  
426 amount of ZRLC in WT and TgGFP(+) embryo hearts confirmed ZRLC content removed  
427 ( $ZRLC_{rem}$ , eq. 2) by their comparison to control  $\beta$ -actin expression (**panel c**).

428

429

430

### 431 **Effect of HCRLC-GFP on zebrafish embryo heart contractility.**

432 **Fig 5** compares heart rate in beats per minute (BPM), shortening fraction (SF), and  
433 cyclical ventricle volume changes for WT and TgGFP(+) embryos in the presence (blue) and  
434 absence (black) of PTU. Error bars show standard deviation for *n* embryos. HCRLC-GFP  
435 incorporation into ~60% of the cardiac myosins in the heart has no significant impact on  
436 performance measured with these metrics. The PTU treatment inhibits melanogenesis and  
437 improves contrast in embryo heart images. It likewise has no significant impact on these metrics.

438

439

440

441 **Fig 5. Comparison of heart rate in beats per minute (BPM), shortening fraction (SF), and**  
442 **cyclical ventricle volume changes for WT and TgGFP(+) embryos in the presence (blue)**  
443 **and absence (black) of PTU treatment.** Error bars show standard deviation for *n* embryos.

444

445

446

447 **Quantitation of embryonic zebrafish cardiac myosin lever-arm swing during**  
448 **the heart beat cycle.** At 3-4 dpf, TgGFP(+) embryos were imaged to detect single cardiac  
449 myosin dynamics in the ventriculum as described in METHODS. **Fig 6** shows a single frame  
450 from a movie and the averaged image of the beating heart where single molecule candidates are  
451 visible. This movie records ~6 sequential in-focus images of the sarcomeres followed by ~4  
452 blurred images of shortening or otherwise moving sarcomeres and muscle fibers. In-focus

453 images show approximately isovolumetric contraction since muscle shortening follows. We  
454 observed that the S/N ratio of the single myosin fluorescence is largest at highest isometric force  
455 just before ejection. We use this feature to synchronize the cardiac cycle with fluorescence  
456 intensity. The 1-2 highest S/N images were used for quantitation of the near-isometric  
457 contraction phase. The remaining 4-5 in-focus images were used for quantitation of the  
458 auxotonic contraction phase. We also stopped the heart by raising tricaine to 2200 mg/l in the  
459 microfluidic containing the embryo then briefly imaged the constantly-relaxed cardiac myosin.

460

461

462

463 **Fig 6. A single frame (left) and an averaged image of the heart (right) running at 50-60**  
464 **bpm.**

465

466

467

468 Single myosin candidate images are isolated into 11x11 pixel movies from which the  
469 total intensity of each frame is plotted over time. From the intensity vs time plots we identify the  
470 single molecule photoactivation and photobleaching events thus qualifying the single myosin  
471 movie for inclusion into the data set. **Figs A & B** in S1 File indicate intensity vs time plots for  
472 single myosins in active and relaxed cardiac muscle.

473 The single molecule intensity patterns from zebrafish embryo single cardiac myosins  
474 were fitted using the pattern recognition algorithm and subjected to orientation super-resolution  
475 analysis [28, 29]. Time-resolved coordinates, having dipole or lever-arm helix spherical polar  
476 angles ( $\beta', \alpha'$ ) or ( $\beta, \alpha$ ) defined relative to a fiber fixed frame (**Fig 1**), indicate the trajectories for  
477 a single dipole or lever-arm. Dipole orientation data impacts the best choice for the S1/GFP  
478 coordination. The new data representing cardiac myosin in relaxed and active muscle is  
479 consistent with the previous data selecting the S1/GFP coordination in **Fig 1** over other docked

480 models [10, 11]. The arc subtended by,  $\Phi$ , the angle a single lever-arm helix rotates in sequential  
481 images defines a sequence of chords on a circle of diameter  $L$  equal to the lever-arm length  
482 indicated in **Fig 3**. Chord length is step-size,  $d$ , given by eq. 3.

483 We modeled the force developing homogeneous auxotonic and isometric phases,  $\Delta v_{\text{au}}$   
484 and  $\Delta v_{\text{is}}$  using eq. 4 and as described there. Known relaxed and active step-size histograms  $v_{\text{re}}$ ,  
485  $v_{\text{au}}$ , and  $v_{\text{is}}$  are assigned their Poisson distributed noise and randomly sampled while  $\Delta v_{\text{au}}$  or  $\Delta v_{\text{is}}$   
486 are minimized for each trial by selection of  $c_1$  and  $c_2$  or  $c_3$  and  $c_4$  subject to constraints  $c_1, c_2, c_3,$   
487  $c_4, \Delta v_{\text{au}}$ , and  $\Delta v_{\text{is}}$  all  $\geq 0$  using constrained linear programming. We estimate average and variance  
488 for  $\Delta v_{\text{au}}$  and  $\Delta v_{\text{is}}$  from the trials. Standard deviation of the mean for  $\Delta v_{\text{au}}$  or  $\Delta v_{\text{is}}$  is computed for  
489 15 or 24 cardiac muscle fibers from 8 or 6 embryos and corresponding to 1251 or 1436 single  
490 myosin coordinates from relaxed and active hearts, respectively.

491 **Fig 7 panels a-c** display the cardiac myosin cycle from homogeneous auxotonic ( $\Delta v_{\text{au}}$ ),  
492 through homogeneous near-isometric ( $\Delta v_{\text{is}}$ ), to relaxation ( $v_{\text{re}}$ ). **Fig 7 panel d** compares in vivo  
493 skeletal myosin step-size in relaxation from zebrafish embryo trunk muscle [11] with the cardiac  
494 data. The skeletal (red) contrasts with the cardiac relaxed muscle (black) from the present study  
495 (**panels c or d**) where the relaxed cardiac myosins occupy a 2x larger step-size domain. The  
496 difference could be due to the higher time-resolution in the cardiac measurement or to other  
497 factors distinguishing cardiac and skeletal myosin. The former could convert a stationary relaxed  
498 lever-arm orientation observed from the in vivo skeletal myosin time-resolved trajectory into the  
499 non-stationary one observed for the in vivo cardiac myosin provided dynamic/static myosin  
500 rotational relaxation time was poised between 100 and 1000 ms. This is unlikely because rotation  
501 relaxation of the myosin head in relaxed skeletal muscle is on the order of 300-1000 ns [30].  
502 Considering the latter, inter- and intra-myosin dimer interactions are known to impact relaxed  
503 myosin structure in cardiac thick filament [26] possibly leading to the more widely statically and  
504 dynamically distributed relaxed lever-arm [27]. We simulated the potential effect of thick  
505 filament interactions on relaxed cardiac myosin apparent step-size using the tarantula skeletal  
506 muscle thick filament structure as a model [27] and the approach described in METHODS. **Fig 7**  
507 **panel d** compares simulated (blue) and observed relaxed myosin step-size distributions from  
508 cardiac (black and same as in **panel c**) and skeletal (red) zebrafish embryo muscle. Agreement  
509 between the cardiac muscle and simulated curves implies that inter- and intra-myosin dimer

510 interactions impacting relaxed myosin structure in cardiac thick filament could explain the larger  
511 apparent step-size domain compared to the zebrafish skeletal muscle. While thick filament  
512 dispersion is likely also manifest in the skeletal muscle, our data suggests cardiac muscle myosin  
513 is dynamically distributed more widely on the 100 ms time scale.

514

515

516

517 **Fig 7. Panels a-c. In vivo cardiac myosin active cycle from auxotonic (force developing),**  
518 **through near-isometric (maximum force), to detachment (relaxation) phases.** Error bars  
519 indicate standard deviation of the mean for 15 or 24 cardiac muscle fibers from 8 or 6 embryos  
520 and corresponding to 1251 or 1436 single photoactivated myosin coordinates from relaxed and  
521 active hearts, respectively. Dotted vertical lines in panels **a & b** define the boundaries between  
522 step-size frequencies computed from areas under the curves for nominal steps of 0, 3, 5, and 8  
523 nm (nominal step-size corresponds to the in vivo measured step-sizes of 0, 2, 4, and 6 nm as  
524 indicated on the x-axis legend). Areas at step-size boundaries are split equally between adjoining  
525 step-sizes. **Panel d.** Simulated (blue) and observed (black and same as in **panel c**) relaxed  
526 cardiac (ca) myosin step-size distribution. Simulation is based on dispersion of thick filament  
527 structure surmised from the atomic model of Alamo et al. [27] as described in METHODS. In  
528 vivo relaxed skeletal (sk) myosin step-size from zebrafish embryo trunk muscle (red) is shown  
529 for comparison [31].

530

531

532

533 Time-resolved single molecule experiments follow myosin through its cycle in real time.  
534 These data are summarized with event/step-size histograms also indicating step-frequency for the  
535 three unitary step-sizes observed. In vivo step-size from homogeneous auxotonic and near-  
536 isometric cardiac myosin in **Fig 7 panels a & b** indicates step-size probabilities peaking at ~2, 4

537 and 6 nm paralleling the unloaded in vitro estimates of ~3, 5, and 8 for zebrafish skeletal myosin  
538 [11]. Strain in the active cardiac myosin under load probably affects the apparent in vivo step-  
539 sizes by compacting the lever-arm rotation angle  $\Phi$ . **Fig 7 panel b** indicates a force bearing 0  
540 length step-size in the near-isometric phase that is unique to the in vivo myosin.

541

#### 542 **Contraction cycle 4-pathway model.**

543 **Fig 8** indicates a 4-pathway network producing 3, 5, and 8 nm steps (2, 4, and 6 nm in  
544 vivo) over the in vivo myosin cycle. Actin weakly attached states fall outside the dashed green  
545 box. Quantities  $f_i$  are myosin flux through the cycle with green and black indicating observed  
546 and computed values. We have shown previously using the Qdot assay that the basis of the 3, 5  
547 and 8 nm unitary steps is the actin binding of the ELC N-terminus in a mechanism summarized  
548 in the figure [5]. Ignoring for a moment the shaded regions containing hypothetical strain  
549 dependent states, the bottom pathway with flux  $f_4$  performs the 5 nm step with release of product  
550 (Pi followed by ADP) but without attachment of the ELC N-terminus then ATP binding and  
551 actin detachment ( $f_5$ ). Alternatively, following a 5 nm step, slow ADP dissociation allows the  
552 ELC N-terminus to occasionally bind actin to make a subsequent 3 nm step with ADP release  
553 ( $f_7$ ) then ATP binding and actin detachment. The top pathway ( $f_1$ ) performs the 8 nm step with  
554 product release (Pi followed by ADP) and attachment of the ELC N-terminus then ATP binding  
555 and actin detachment. Pathways just described were identified previously in the context of the  
556 Qdot assay [5]. The middle pathway has flux  $f_3$  and a 3 nm step not preceded by a 5 nm step. It  
557 has Pi release without strong actin binding to avoid a 5 nm step, followed by ADP bound myosin  
558 strong actin attachment, then the 3 nm displacement. It is populated when actin has sufficient  
559 resisting force explaining its absence from the unloaded Qdot assay experiments. It is needed to  
560 accommodate the real situation when the quantity of 3 nm steps exceeds that of 5 nm steps. For  
561 each myosin state, blue vector  $\mathbf{v}$  at the end of the myosin lever-arm is positive net force on, and  
562 positive velocity of, the thick filament in units where amplitudes are equal.

563

564

565

566 **Fig 8. Myosin flux through the 4-pathway network contrasting 3 phases of muscle**

567 **contraction in the beating heart.** Myosin begins and ends detached from actin and with ATP  
568 bound in the contraction cycle. The green box with dashed line boundaries group the strong  
569 actomyosin bound states. Blue vector  $\mathbf{v}$  at the end of the myosin lever-arm is positive net force  
570 on, and positive velocity of, the thick filament in units where amplitudes are equal. Fluxes  
571 through the network,  $f_i$ , differ depending on contraction phases (values in **Table 1**). Measured  
572 values for  $f_i$  are in green while computed values are indicated in black. Four pathways cross from  
573 beginning to end of the contraction cycle. The top pathway populated by flux  $f_1$  executes an 8 nm  
574 step-size. The middle pathway populated by flux  $f_3$  executes a 3 nm step-size. It releases Pi while  
575 weakly actin bound without doing work. The bottom pathway populated by flux  $f_4$  is branched  
576 and executes 5 or 5+3 nm step-sizes. The branch from the bottom pathway is populated by flux  $f_7$   
577 and executes the 5+3 nm step-size. Strain sensitivity is modeled with mechanisms in two  
578 subpathways within the shaded regions. The upper mechanism is populated by fluxes  $f_2$  and  $f_8$   
579 from the 8 and 3 nm steps when the ELC N-terminus binds actin for actomyosin in rigor. The  
580 taut (blue line), intermediate (green curve), and slack (red wave) ELC N-terminus for muscle in  
581 near-isometric, auxotonic, or unloaded phases have high, modest, or zero strain when net force  $\mathbf{v}$   
582 is zero in isometric, intermediate in auxotonic, or high in unloaded phase. The linear (blue) actin  
583 bound ELC N-terminus is proposed to inhibit ATP binding by lowering active site accessibility  
584 for ATP at the small arrow near the myosin head. Inhibited ATP binding extends actomyosin  
585 attachment time indicated by the clock icon and quantitated in our single myosin measurements  
586 as a 0 length step. The lower mechanism is populated by flux  $f_6$  from the 5 nm step with ADP  
587 bound. Near-isometric, auxotonic, or unloaded phases have high, intermediate, or zero strain (of  
588 an unspecified myosin element) when net force is zero, intermediate, or high. Strain lowers ADP  
589 release rate. Short duration ADP rate inhibition flux,  $f_7$ , leaves to continue with the 3 nm step.  
590 Long duration ADP rate inhibition flux,  $f_6 - f_7$ , continues with the 0 length step. For either the  
591 ATP accessibility or ADP release rate mediated mechanisms (top or bottom strain sensing  
592 mechanisms), low net force inhibits myosin cycling by extending the time myosin is strongly  
593 actin bound by  $>2\Delta t$ .

594

595

596

597 Shaded regions in **Fig 8** contain models for long lived strained conformation states in two  
598 mechanisms. The upper mechanism is populated by fluxes  $f_2$  and  $f_8$  from the 8 and 3 nm steps  
599 when the ELC N-terminus binds actin and the myosin is in rigor. The taut (blue) versus slack  
600 (red) ELC N-terminus in near-isometric versus unloaded phases have high versus zero strain  
601 when net force (or velocity) is zero in isometric contraction versus  $\gg 0$  in unloaded conditions.  
602 Taut ELC N-terminus is proposed to strain myosin in rigor (strained rigor) inhibiting ATP  
603 binding by lowering active site ATP accessibility as indicated by the size of the opening at the  
604 arrow near the myosin head. Delayed ATP binding and detachment (for  $>2\Delta t$ ) gives a state  
605 observed as the force bearing 0 length step ( $f_2$  or  $f_8$ ). Slack ELC N-terminus has only prompt  
606 ATP binding and actin detachment ( $f_2 = f_8 = 0$ ). The lower mechanism is populated by flux  $f_6$   
607 from ADP bound myosins. Near-isometric versus unloaded phases have high versus zero strain  
608 when net force (or velocity) is zero in isometric contraction versus  $\gg 0$  in unloaded conditions.  
609 ADP release rate is diminished in the former case. Spontaneously slow ADP release that is not  
610 caused by strain allows additional time ( $\sim\Delta t$ ) for the ELC N-terminus to bind actin and perform a  
611 3 nm step. Flux  $f_7$  follows this pathway. The remainder has delayed ADP release caused by strain  
612 (for  $>\Delta t$ ) giving a state observed as a 0 length step. Unloaded conditions without strain have  $f_6 =$   
613 0 with prompt ATP binding and actin detachment ( $f_5$ ) or a subsequent 3 nm step ( $f_7$ ). For either  
614 mechanism, the net effect of high strain is to inhibit myosin cycling by extending the time by  
615  $>2\Delta t$  that myosin is strongly actin bound giving the 0 length step state with a summed flux,  $f_9 =$   
616  $f_2 + f_6 - f_7 + f_8$ , measured by the data in **Fig 7**.

617 The force bearing 0 length step-size involves a temporary diversion of myosin flux into  
618 an inhibited state that does not provide a parallel pathway through the myosin active cycle.  
619 Traditional normalization has step-frequencies for the 3, 5, and 8 nm steps summing to 1 such  
620 that,

621 
$$x_0 = \frac{\omega_0}{1-\omega_0}, \quad x_3 = \frac{1-(\omega_0+\omega_5+\omega_8)}{1-\omega_0}, \quad x_5 = \frac{\omega_5}{1-\omega_0}, \quad \text{and} \quad x_8 = \frac{\omega_8}{1-\omega_0} \quad (5)$$



622 where  $\omega_0$ ,  $\omega_3$ ,  $\omega_5$ , and  $\omega_8$  are areas under the probability curves for the ~0, 3, 5, and 8 nm step-  
623 sizes indicated in **Fig 7 panels a & b**. Flux values for all phases studied are summarized in  
624 **Table 1**. The caption provides additional details about quantitation of  $\omega_0$ ,  $\omega_3$ ,  $\omega_5$ , and  $\omega_8$  from  
625 **Fig 7** and the optimization routine to obtain fluxes not directly observed.

626

627

628 **Table 1**<sup>a</sup>. Cardiac myosin flux through *in vivo* active cycle in 3 phases.

|                     |                      | Step-probability |            |            |                     |            |                  |               |               |                     |
|---------------------|----------------------|------------------|------------|------------|---------------------|------------|------------------|---------------|---------------|---------------------|
| phase               | $\omega_0$           | $\omega_3$       | $\omega_5$ | $\omega_8$ |                     |            |                  |               |               |                     |
| Unloaded (n=27)     | 0                    | 0.13±0.04        | 0.50±0.09  | 0.37±0.08  |                     |            |                  |               |               |                     |
| Auxotonic (24)      | 0.03±0.12            | 0.44±0.27        | 0.45±0.17  | 0.08±0.04  |                     |            |                  |               |               |                     |
| Near-isometric (24) | 0.33±0.02            | 0.54±0.04        | 0.12±0.03  | 0.01±0.01  |                     |            |                  |               |               |                     |
|                     |                      |                  |            |            |                     |            |                  |               |               |                     |
|                     |                      | Flux             |            |            |                     |            |                  |               |               |                     |
| phase               | $f_1$                | $f_2$            | $f_3$      | $f_4$      | $f_5$               | $f_6$      | $f_7$            | $f_8$         | $f_9$         | $f_{10}$            |
| Unloaded            | 39±7                 | 0                | 5±8        | 56±9       | 43±11               | 13±9       | 13±9             | 0             | 0             | 18±12               |
| Auxotonic           | 10±5                 | 2±1              | 31±23      | 59±23      | 37±21               | 29±11      | 21±9             | 3±4           | 13±11         | 52±22               |
| Near-isometric      | 2±1                  | 1±1              | 80±5       | 18±5       | 12±3                | 15±4       | 6±2              | 42±5          | 52±4          | 86±3                |
| notes               | input<br>&<br>output | $\leq f_1$       | input      | input      | output<br>$f_4-f_7$ | $\leq f_5$ | 5→3<br>$f_4-f_5$ | $\leq f_{10}$ | $f_2+f_6+f_8$ | output<br>$f_3+f_7$ |

629 <sup>a</sup> **Table 1** (top) has step-probabilities measured from the data in **Fig 7 panels a & b** for 0, 3, 5,

630 and 8 nm steps (0, 2, 4, and 6 nm in vivo) computed from areas under the probability curves and  
631 for auxotonic and isometric phases. Areas are defined in the figure panels by the vertical dotted  
632 lines with probability at the step-size boundaries split equally between adjoining areas. Data for  
633 the unloaded phase is taken from earlier in vitro work on porcine ventricular myosin (MYH7) [5,  
634 17]. Step-probabilities  $\{\omega_0, \omega_3, \omega_5, \omega_8\}$  are normalized to sum to 1. Errors are standard deviation  
635 for (n) replicates. **Table 1** (bottom) has flux quantities,  $f_i$ , for the 4 step-size network defined in  
636 the **Fig 8** model. Several flux values relate to known step-frequencies using eq. 5 and where  $f_1 =$   
637  $x_8$ ,  $f_4 = x_5$ ,  $f_9 = x_0$ , and  $f_{10} = x_3$ . Other fluxes are surmised by using constraints. Flux conservation  
638 equality constraints include (total input)  $f_1+f_3+f_4 = f_1+f_5+f_{10}$  (total output),  $f_4 = f_5+f_7$  (5 nm step  
639 input detaches or continues to 3 nm step),  $f_3+f_7 = f_{10}$  (3 nm step input sums with 5/3 nm step  
640 conversion then detaches with a 3 nm step), and  $f_2+f_6 -f_7+f_8 = f_9$  (total 0 length steps). The  
641 problem is under determined by equality constraints hence it is solved in two steps: first using  
642 equality constraints eliminating 4 parameters, second using 3 equality constraints relating  $f_2$ ,  $f_3$ ,  
643  $f_5$ ,  $f_6$ ,  $f_7$ , and  $f_8$  and inequality constraints for these variables. Inequality constraints are  $f_2 \leq x_8$ ,  $f_2$   
644  $\leq x_0$ ,  $f_3 \geq x_3-x_5$ ,  $f_3 \leq x_3$ ,  $f_5 \leq x_5$ ,  $f_6 \leq x_5$ ,  $f_7 \leq f_6$ ,  $f_7 \leq x_5$ ,  $f_8 \leq x_3$ ,  $f_8 \leq x_0$ , and all unknowns  $\geq 0$ . The  
645 latter equality and inequality constraints are sufficiently restrictive to identify convergent  
646 solutions for the fluxes for each phase using constrained linear programming in Mathematica. We  
647 estimate standard deviations for fluxes within all constraints by generating random variates using  
648 normal distributions for  $\{\omega_0, \omega_3, \omega_5, \omega_8\}$ , computing  $x_0$ ,  $x_3$ ,  $x_5$ , and  $x_8$  using eq. 5, then solving  
649 for the unknown flux values. Flux errors are standard deviation for (n) replicates. Total input (or  
650 equivalently total output) is re-normalized to 100% post hoc facilitating comparison between  
651 phases.

652

653

654 Step-frequencies quantitate step-size probability but they are ambiguous in the 4-  
655 pathway network since a particular myosin passing through its cycle could do 5 then 3, 5, or 3  
656 nm steps. The relative fluxes through the 4 pathways in **Fig 8** are unique in this regard. **Table 2**  
657 summarizes myosin 4-pathway flux for the beating zebrafish embryo heart. They accommodate

658 the new step-size generating model in which the 3 nm step has a dedicated input pathway in  
 659 addition to the 3 nm step dependent on input to the 5 nm step.

660

661

662 **Table 2. Myosin flux through the 4-pathway network in a zebrafish embryo beating heart.**

|                              | step-size (in nm) <sup>a</sup> and normalized flux <sup>b</sup> |             |             |             |
|------------------------------|-----------------------------------------------------------------|-------------|-------------|-------------|
| phase                        | 8 nm                                                            | 5 nm (only) | 3 nm (only) | 5 then 3 nm |
| Unloaded (n=27) <sup>c</sup> | 39±7                                                            | 43±11       | 5±21        | 13±9        |
| Auxotonic (24)               | 11±5                                                            | 43±22       | 25±31       | 21±9        |
| Near-isometric (24)          | 2±1                                                             | 12±3        | 80±6        | 6±2         |

663 <sup>a</sup> Step-sizes in vivo are ~6, 4, and 2 nm.

664 <sup>b</sup> Fluxes reflect total input or output at 100% for each phase. Errors are standard deviation for (n)  
 665 replicates.

666 <sup>c</sup> Data for the unloaded phase is taken from earlier in vitro work on porcine ventricular myosin  
 667 (MYH7) [5, 17].

668

669

670 The unloaded phase in **Fig 8** occupies the earliest part of the force producing cycle when  
 671 velocity and net force are positive and largest. We model it with characteristics from the  
 672 unloaded in vitro assay and under the assumption that there are no 0 length steps ( $f_0 = 0$ ). The  
 673 ELC N-terminus is shown as a slack curve (red) indicating it does not undergo enhanced or  
 674 prolonged strain for large velocity and net force ( $v \gg 0$ ). Input flux separates 39/5/56 into the 8,  
 675 3, and 5 nm step pathways ( $f_1$ ,  $f_3$ , and  $f_4$ ) where  $f_1$  and  $f_4$  are derived initially from the traditional  
 676 step-frequency percentages ( $\omega_8$  and  $\omega_5$ ) of 37 and 50% then undergo input normalization to

677 accommodate unknown  $f_3$ . A fraction of myosins completing the 5 nm step release ADP with the  
678 attachment of the ELC N-terminus ( $f_6 = f_7$ ) to perform a subsequent 3 nm step. These are joined  
679 by the direct contribution ( $f_3$ ) together giving 18% of the output flux  $f_{10}$ . The pure 5 nm step  
680 output ( $f_5$ ) contributes 43% and the 8 nm step ( $f_1$ ) independently contributes 39% of the output  
681 flux. Output flux is  $f_1+f_5+f_{10} = 100\%$ .

682 The auxotonic phase in **Fig 8** produces lower velocity and net force than the unloaded  
683 phase. It is characterized directly from the in vivo step-size data (**Fig 7**). The total 0 length step  
684 flux ( $f_9$ ) is approximately equivalent to error (**Table 1**). The observation that few 0 length steps  
685 occur in the auxotonic phase lends credibility to the assumption that the unloaded phase makes  
686 no 0 length steps. The ELC N-terminus is shown as a nearly taut curve (green) representing  
687 modestly enhanced or prolonged strain when velocity and net force are modestly positive ( $v > 0$ ).  
688 Input flux separates 10/31/59 into the 8, 3, and 5 nm step pathways ( $f_1$ ,  $f_3$ , and  $f_4$ ). The input flux  
689 of the 5 nm step ( $f_4$ ) is about equal to that in the unloaded phase but more of these myosins also  
690 undergo the coupled 3 nm step ( $f_7$ ). These are joined by the direct contribution ( $f_3$ ) together  
691 giving all of the output flux  $f_{10}$ . Thus the 3 nm step-size flux enjoys a ~3-fold increase over the  
692 unloaded phase. The 8 nm step suffers a 4-fold reduction in flux from 39 to 10% ( $f_1$ ) when  
693 compared to the unloaded phase. The modest net force probably lowers ADP release rate  
694 sufficiently to shift myosin flux into  $f_7$  favoring the 3 nm step pathway over the terminal 5 nm  
695 step pathway ( $f_5$ ) but insufficiently to produce significant 0 length steps.

696 The near-isometric phase in **Fig 8** produces near zero velocity and net force. It is also  
697 characterized directly from the in vivo step-size data (**Fig 7**). The 0 length step flux at 52% ( $f_9$ )  
698 indicates that half of the cardiac myosins have inhibited detachment from actin due to strain. The  
699 ELC N-terminus is shown as a taut curve (blue) representing strongly enhanced or prolonged  
700 strain when velocity and net force are nearly zero ( $v \approx 0$ ). Input flux separates 2/80/18 into the 8,  
701 3, and 5 nm step pathways ( $f_1$ ,  $f_3$ , and  $f_4$ ). The terminal 5 nm step-size flux ( $f_5$ ) is low with 3 out  
702 of 4 myosins first undergoing strain dependent inhibition. The 3 nm step-size flux ( $f_{10}$ ) accounts  
703 for most myosins at 86%, a large increase over auxotonic phase, but in this case most myosins  
704 (80%) arrive there by the direct route with  $f_3$ . The 8 nm step-size flux at 2% ( $f_1$ ) is negligible.  
705 The zero net force is proposed to enhance or prolong ELC N-terminus strain in strained rigor to  
706 inhibit ATP binding and strongly shift myosin flux ( $f_6$  and  $f_8$ ) to favor the 0 length step

707 pathways. High flux through the 3 nm step-size pathway implies it clears the backlog of high  
708 free energy or tension producing myosins at near-isometric force as it can continue to move  
709 myosins through the active cycle when the other step-size pathways cannot indicating how the  
710 motor down shifts to smaller step-size pathways in the near-isometric phase.

711           Dominance of the 3 nm step in isometric contraction implies a deeper significance  
712 because this step results from actin binding of the ELC N-terminus. It implies the ELC N-  
713 terminus is the nanomotor ratchet that locks the myosin into a force bearing state (0 length step)  
714 until there is additional forward movement from another motor in the ensemble or when loading  
715 force decreases with the movement of blood such that the ratchet can release locked myosin to  
716 complete its ATPase cycle.

## 717 **Discussion**

718 Myosin in striated muscle transduces ATP free energy into the mechanical work of  
719 moving actin. It does so using cyclical rotary movement of the lever-arm/light-chain complex  
720 linking motor generated torque to the myosin filament backbone. The linear actin displacement  
721 due to lever-arm rotation defines the unitary myosin step-size. The essential in vitro myosin  
722 structure/function paradigm is captured by its single molecule mechanical characteristics  
723 measured using the Qdot assay characterizing motor step-size and step-frequency [32]. Muscle  
724 myosin performance beyond the essential structure/function paradigm is influenced by self-  
725 assembly and integration with other motors and proteins in the muscle sarcomere. The native  
726 integrated myosin, with potential for hierarchical coordinated functionality and regulation  
727 because of its structured environment, was investigated here with cardiac myosin in live  
728 zebrafish. We developed tools to measure and interpret in vivo single cardiac myosin lever-arm  
729 rotation in a beating heart and estimate the cardiac myosin step-size and step-frequency. These  
730 metrics provide unprecedented insight into native cardiac myosin structure/function.

731 Myosin unitary step-size and rotation (tilt) has been studied for a long time. Ensemble  
732 myosin techniques used active muscle quick release or quick stretch length transients followed  
733 by time-resolved measurements of force [33], myosin polarized fluorescence [34-36], and X-ray  
734 diffraction [37] to compute the average unitary step-size or tilt under various loads. Later,  
735 because of the laser trap [38], in vitro single myosin step-size measurements became a standard  
736 and loaded myosin had a single, shorter, step-size [39]. Interest remained in ensemble force and  
737 X-ray methods because they worked on live excised tissue where average step-size was likewise  
738 shown to shorten with load. With transgenic zebrafish and the activatable tag on myosin,  
739 measuring in vivo single myosin step-size is now possible as we report here. Although our work  
740 on in vivo cardiac myosin extends our in vitro work where we identified the 3 unitary step-sizes  
741 and their step-frequencies [17], there is also overlap and general agreement with the ensemble  
742 average step-size measurements indicating a shorter average step with higher load. Comparing  
743 ensemble average and single myosin results we find there are three critical distinctions. We  
744 report that the average step-size shortens under increasing load due to shifting frequencies  
745 among short, intermediate, and long unitary step-sizes, we directly observe the force bearing 0  
746 length step, and the mechanism for how all of it is accomplished involving ELC N-terminus actin

747 binding follows directly from earlier in vitro single myosin measurements [5, 17]. The latter  
748 indicates that shifting step-frequencies to favor the short step is a downshifting maneuver caused  
749 by the ratcheting effect of the actin bound ELC N-terminus also showing that the in vitro and in  
750 vivo systems closely correlate.

751 **Fig 7 panel d** contrast in vivo relaxed cardiac and skeletal myosin apparent step-size  
752 probabilities indicating a more orientationally dynamically dispersed native cardiac myosin  
753 lever-arm. Cardiac myosin is known to maintain various special conformations in relaxation  
754 related to a super-relaxation state [26, 40-42] and the effect of RLC phosphorylation [43]. These  
755 circumstances could impact relaxed myosin conformational sampling. We modeled this effect  
756 using the structural heterogeneity indicated in an atomic model reconstruction for tarantula  
757 myosin filament [27] and estimated relaxed lever-arm apparent step-size by computing  $\Phi$  for  
758 random variates of the thick filament structure substituting for a time-dependent trajectory.  $\Phi$ 's  
759 are converted to step-size using eq. 3 giving a pseudotime-dependent single myosin signal that  
760 compares favorably to observation as indicated in **Fig 7 panel d**. While divergence of in vivo  
761 lever-arm time-dependent trajectories in cardiac and skeletal muscle could be from the higher  
762 time-resolution in the new cardiac measurement, earlier work with relaxed porcine cardiac  
763 ventricular myosin lever-arm orientation from permeabilized papillary muscle fibers indicated a  
764 similar pattern when compared to skeletal muscle at equivalent time resolutions [10]. We  
765 conclude that the divergence of in vivo cardiac and skeletal observations on relaxed muscle  
766 relates to the special conformations of cardiac thick filament.

767 Myosin translates actin when the two proteins are strongly bound. In the Qdot assay,  
768 unitary actomyosin interactions are characterized in vitro with super-resolution microscopy [17].  
769 Qdot assaying of porcine  $\beta$ -ventricular myosin ( $\beta$ mys) indicated three unitary steps-sizes of ~3,  
770 5, and 8 nm with relative step frequencies of ~13, 50, and 37% [17]. Similar results were  
771 obtained using the assay for adult zebrafish skeletal myosin step-size and step-frequency [11].  
772 ELC N-terminus binding to actin is the mechanism for generating the 3 unitary steps [5] that is  
773 modeled in a 4-pathway network in **Fig 8**.

774 In vivo step-size and step-frequency from auxotonic and near-isometric cardiac myosin in  
775 **Fig 7 panels a & b** indicates step-sizes of ~2, 4 and 6 nm paralleling the unloaded in vitro

776 estimates of ~3, 5, and 8 for porcine cardiac myosin plus a force producing 0 length step unique  
777 to the native in vivo environment. Strain in the active cardiac myosin under load probably lowers  
778 measured in vivo step-sizes by affecting the apparent lever-arm rotation angle  $\Phi$  and also  
779 causing the 0 length step. The step-size and step-frequency data from **Fig 7 panels a & b** are  
780 interpreted in **Fig 8** showing myosin flux through the 4-pathway network for unloaded,  
781 auxotonic, and near-isometric phases of cardiac muscle contraction. Increasing load (smaller net  
782 force or velocity  $v$ ) changes step-frequencies to favor shorter steps such that in near-isometric  
783 conditions the long 8 nm step is practically eliminated, the 5 nm step is down-regulated from the  
784 unloaded value of 43 to 12%, while the shortest 3 nm step is up-regulated from the unloaded  
785 value of 5 to 80% of the total steps (**Table 2**). Uniquely, the 5 then 3 nm step up regulates then  
786 down regulates when the muscle transitions from unloaded to isometric phases suggesting its  
787 role is to better accommodate rapidly changing force production conditions when the 8 nm step  
788 is too long but the 3 nm step is too short to maintain power requirements. That the 3 nm exceeds  
789 5 nm step-frequency under high load implied the new mechanism for step-size generation where  
790 the 3 nm step contributes both independently and together with the 5 nm step. This is unlike  
791 previous assertions that the 3 nm step strictly follows on the 5 nm step based on in vitro work  
792 [5]. Increasing load also causes the muscle to make use of the force producing 0 length step that  
793 holds tension by remaining strongly actin bound when sliding velocity is near zero. We find that  
794 the correlation of rising 0 length and 3 nm step-frequencies with lower 5 and 8 nm step-  
795 frequencies and higher resisting force implicates the ELC N-terminus and strained rigor  
796 conformation in strain sensing. This observation could be at odds with earlier in vitro motility  
797 work looking at strain-dependence in mouse cardiac myosin under load where strain enhanced  
798 ATP affinity for actomyosin [44] although loads were short of near-isometric where the ELC  
799 ratchet is expected to lower ATP affinity for actomyosin. The video file in S5Movie has an  
800 audio/visual description/representation of myosin flux through the 4-pathway network during  
801 unloaded, auxotonic, and near-isometric contraction. The written description for the S5 Movie is  
802 in S2 File. The latter elaborates on the audio portion of the movie and contains one equation.

803 The proposed mechanisms for strain sensing in vivo, depicted in **Fig 8**, has the ELC  
804 ratchet causing the time extended strained rigor state by inhibiting ATP binding, and, the strain  
805 dependent ADP release causing the time extended ADP state by inhibiting ADP release. The  
806 ELC mediated mechanism accounts for most (42 of 52%) of the total flux into the force



807 producing 0 length step in near-isometric phase. The inhibition efficiency of the strain dependent  
808 mechanisms, defined as the flux into the 0 length step divided by the total flux through the  
809 contributing pathway, suggests that the strain-dependent ADP release mechanism shuts down  
810 flux to the 0 length step pathway from the 5 nm step pathway. Instead the flux travels through  
811 the less inhibiting ELC ratchet mediated strain dependent mechanism.

812

## 813 **Conclusion**

814 Cardiac ventriculum myosin transitioning from low to high force causes motor down-  
815 shifting to a 3 nm step-size accounting for >80% of all steps in the near-isometric contraction  
816 phase. We propose that strain delays ATP dissociation of actomyosin at isometric force using a  
817 mechanism involving the ratcheting effect of the actin bound ELC N-terminus. The significance  
818 of ELC N-terminus actin binding follows directly from earlier in vitro single myosin  
819 measurements [5, 17] showing close correlation between in vitro and in vivo systems. Enhanced  
820 occupation of the 0 length step hints at a mechanism for restrictive cardiomyopathy (RCM)  
821 caused by mutation in ELC [45]. Strongly bound myosins fail to detach quickly due to a fault in  
822 the ELC N-terminus strain sensing inhibiting detachment under low load conditions. It produces  
823 a drag force during stretch when the muscle should be fully relaxed.

824 We explored transduction/mechanical coupling in the beating heart at the single myosin  
825 level. High time resolution imaging captures and discriminates the native single myosin behavior  
826 during auxotonic and isometric phases of its contractile cycle providing deep insight into the  
827 significance of the cardiac myosin strain dependent biochemistry. Overall our approach provides  
828 a unique bottom-up assessment of the muscle motor performance by combining high precision  
829 single myosin mechanical characterization in an integrated and hierarchically functioning native  
830 muscle machine.

831

832 DISCLOSURE

833 We have no competing interests.

834

## 835 **Supporting information**

836 S1 File. S1 File consists of two figures (A &B) with captions.

837 S2 File. S2 File contains a description of S5 Movie.

838 S1 Movie. S1 Movies contains the video Data147bs(43,171,38,106,90)1.avi.

839 S2 Movie. S2 Movie contains the video Data149bs(190,180,67,121,90)1.avi.

840 S3 Movie. S3 Movie contains the video Data1bs(182,168,98,163,55)1.avi.

841 S4 Movie. S4 Movie contains the video Data230bs(214,217,61,110,45)3.avi.

842 S5 Movie. S5 Movies contains the video Movie5.wmv.

843

844

## 845 **References**

846

847 **1. Huxley HE. The mechanism of muscular contraction. Science. 1969;164:1356-66.**

848 **2. Pant K, Watt J, Greenberg M, Jones M, Szczesna-Cordary D, Moore JR. Removal**  
849 **of the cardiac myosin regulatory light chain increases isometric force production. The**  
850 **FASEB Journal. 2009;23:3571-80.**

851 **3. Burghardt TP, Sikkink LA. Regulatory light chain mutants linked to heart disease**  
852 **modify the cardiac myosin lever-arm. Biochemistry. 2013;52:1249-59.**

853 **4. Lossie J, Köhncke C, Mahmoodzadeh S, Steffen W, Canepari M, Maffei M, et al.**  
854 **Molecular mechanism regulating myosin and cardiac functions by ELC. Biochem Biophys**  
855 **Res Commun. 2014;450(1):464-9.**

856 **5. Wang Y, Ajtai K, Kazmierczak K, Szczesna-Cordary D, Burghardt TP. N-terminus**  
857 **of Cardiac Myosin Essential Light Chain Modulates Myosin Step-Size. Biochemistry.**  
858 **2015;55:186-98.**

859 **6. Burghardt TP, Ajtai K, Chan DK, Halstead MF, Li J, Zheng Y. GFP tagged**  
860 **regulatory light chain monitors single myosin lever-arm orientation in a muscle fiber.**  
861 **Biophys J. 2007;93:2226-39.**

862 **7. Burghardt TP, Josephson MP, Ajtai K. Single myosin cross-bridge orientation in**  
863 **cardiac papillary muscle detects lever-arm shear strain in transduction. Biochemistry.**  
864 **2011;50:7809-21.**

- 865 **8. Tokunaga M, Imamoto N, Sakata-Sogawa K. Highly inclined thin illumination**  
866 **enables clear single-molecule imaging in cells. Nature Methods. 2008;5:159-61.**
- 867 **9. Huang C-J, Tu C-T, Hsiao C-D, Hsieh F-J, Tsai H-J. Germ-line transmission of a**  
868 **myocardium-specific GFP transgene reveals critical regulatory elements in the cardiac**  
869 **myosin light chain 2 promoter of zebrafish. Dev Dyn. 2003;228(1):30-40.**
- 870 **10. Sun X, Ekker SC, Shelden EA, Takubo N, Wang Y, Burghardt TP. In vivo**  
871 **orientation of single myosin lever-arms in zebrafish skeletal muscle. Biophys J.**  
872 **2014;107:1403-14.**
- 873 **11. Burghardt TP, Ajtai K, Sun X, Takubo N, Wang Y. In Vivo Myosin Step-Size from**  
874 **Zebrafish Skeletal Muscle. Open Biology. 2016;6:160075.**
- 875 **12. Chen Z, Huang W, Dahme T, Rottbauer W, Ackerman MJ, Xu X. Depletion of**  
876 **zebrafish essential and regulatory myosin light chains reduces cardiac function through**  
877 **distinct mechanisms. Cardiovasc Res. 2008;79(1):97-108.**
- 878 **13. Zhang J, Wilson GF, Soerens AG, Koonce CH, Yu J, Palecek SP, et al. Functional**  
879 **Cardiomyocytes Derived From Human Induced Pluripotent Stem Cells. Circ Res.**  
880 **2009;104(4):e30-e41.**
- 881 **14. Boulter N, Suarez FG, Schibeci S, Sunderland T, Tolhurst O, Hunter T, et al. A**  
882 **simple, accurate and universal method for quantification of PCR. BMC Biotechnology.**  
883 **2016;16(1):1-14.**

- 884 **15. Marti-Renom MA, Stuart AC, Fiser A, Sanchez R, Melo F, Sali A. Comparative**  
885 **protein structure modeling of genes and genomes. *AnnuRevBiophysBiomolStruct.***  
886 **2000;29:291-325.**
- 887 **16. Rayment I, Rypniewski WR, Schmidt-Base K, Smith R, Tomchick DR, Benning**  
888 **MM, et al. Three-dimensional structure of myosin subfragment-1: A molecular motor.**  
889 ***Science.* 1993;261:50-8.**
- 890 **17. Wang Y, Ajtai K, Burghardt TP. Qdot labeled actin super-resolution motility assay**  
891 **measures low duty cycle muscle myosin step-size. *Biochemistry.* 2013;52:1611-21.**
- 892 **18. Steffen W, Smith D, Simmons R, Sleep J. Mapping the actin filament with myosin.**  
893 ***Proc Natl Acad Sci USA.* 2001;98:14949-54.**
- 894 **19. Timson DJ, Trayer HR, Trayer IP. The N-terminus of A1-type myosin essential**  
895 **light chains binds actin and modulates myosin motor function. *Eur J Biochem.***  
896 **1998;255:654-62.**
- 897 **20. Muthu P, Wang L, Yuan C-C, Kazmierczak K, Huang W, Hernandez OM, et al.**  
898 **Structural and functional aspects of the myosin essential light chain in cardiac muscle**  
899 **contraction. *FASEB J.* 2011;25(12):4394-405.**
- 900 **21. Petzhold D, Simsek B, Meißner R, Mahmoodzadeh S, Morano I. Distinct**  
901 **interactions between actin and essential myosin light chain isoforms. *Biochem Biophys Res***  
902 ***Commun.* 2014;449(3):284-8.**

- 903 **22. Siemankowski RF, White HD. Kinetics of the interaction between actin, ADP, and**  
904 **cardiac myosin-S1. J Biol Chem. 1984;259(8):5045-53.**
- 905 **23. Moczarska A, Kakol I. The influence of regulatory light chains on structural**  
906 **organization of cardiac myosin heads interacting with actin and ATP. BiochemMolBiolInt.**  
907 **1995;37(4):765-72.**
- 908 **24. Kazmierczak K, Xu YY, Jones M, Guzman G, Hernandez OM, Kerrick WGL, et al.**  
909 **The role of the N-terminus of the myosin essential light chain in cardiac muscle**  
910 **contraction. J Mol Biol. 2009;387(3):706-25.**
- 911 **25. Wendt T, Taylor D, Trybus KM, Taylor K. Three-dimensional image reconstruction**  
912 **of dephosphorylated smooth muscle heavy meromyosin reveals asymmetry in the**  
913 **interaction between myosin heads and placement of subfragment 2. Proc Natl Acad Sci**  
914 **USA. 2001;98(9):4361-6.**
- 915 **26. Al-Khayat HA, Kensler RW, Squire JM, Marston SB, Morris EP. Atomic model of**  
916 **the human cardiac muscle myosin filament. Proc Natl Acad Sci USA. 2013;110(1):318-23.**
- 917 **27. Alamo L, Qi D, Wriggers W, Pinto A, Zhu J, Bilbao A, et al. Conserved**  
918 **intramolecular interactions maintain myosin interacting-heads motifs explaining tarantula**  
919 **muscle super-relaxed state structural basis. J Mol Biol. 2016;428(6):1142-64.**
- 920 **28. Bobroff N. Position measurement with a resolution and noise-limited instrument.**  
921 **Rev Sci Instrum. 1986;57:1152-7.**

- 922 **29. Burghardt TP. Single molecule fluorescence image patterns linked to dipole**  
923 **orientation and axial position: Application to myosin cross-bridges in muscle fibers. Plos**  
924 **One. 2011;6:e16772.**
- 925 **30. Burghardt TP, Thompson NL. Motion of myosin cross-bridges in skeletal muscle**  
926 **fibers studied by time-resolved fluorescence anisotropy decay. Biochemistry. 1985;24:3731-**  
927 **5.**
- 928 **31. Burghardt TP, Sun X, Wang Y, Ajtai K. In vitro and in vivo single myosin step-sizes**  
929 **in striated muscle. J Muscle Res Cell Motil. 2016:1-15.**
- 930 **32. Wang Y, Ajtai K, Burghardt TP. Ventricular myosin modifies in vitro step-size**  
931 **when phosphorylated. J Mol Cell Cardiol. 2014;72:231-7.**
- 932 **33. Piazzesi G, Lucii L, Lombardi V. The size and the speed of the working stroke of**  
933 **muscle myosin and its dependence on the force. J Physiol (Lond). 2002;545(1):145-51.**
- 934 **34. Borejdo J, Putnam S, Morales MF. Fluctuations in polarized fluorescence: Evidence**  
935 **that muscle cross bridges rotate repetitively during contraction. Proceedings of the**  
936 **National Academy of Sciences. 1979;76:6346-50.**
- 937 **35. Irving M, Allen TSC, Sabido-David C, Crank JS, Brandmeyer B, Kendrick-Jones J,**  
938 **et al. Tilting of the light-chain region of myosin during step length changes and active force**  
939 **generation in skeletal muscle. Nature. 1995;375:688-90.**



- 940 **36. Burghardt TP, Garamszegi SP, Ajtai K. Probes bound to myosin Cys-707 rotate**  
941 **during length transients in contraction. Proceedings of the National Academy of Sciences.**  
942 **1997;94:9631-6.**
- 943 **37. Reconditi M, Linari M, Lucii L, Stewart A, Sun Y, Boesecke P, et al. The myosin**  
944 **motor in muscle generates a smaller and slower working state at higher load. Nature.**  
945 **2004;428:578-81.**
- 946 **38. Finer JT, Simmons RM, Spudich JA. Single myosin molecule mechanics:**  
947 **piconewton forces and nanometre steps. Nature. 1994;368:113-9.**
- 948 **39. Kaya M, Higuchi H. Nonlinear elasticity and an 8-nm working stroke of single**  
949 **myosin molecules in myofilaments. Science. 2010;329(5992):686-9.**
- 950 **40. González-Solá M, Al-Khayat Hind A, Behra M, Kensler Robert W. Zebrafish**  
951 **cardiac muscle thick filaments: isolation technique and three-dimensional structure.**  
952 **Biophys J. 2014;106(8):1671-80.**
- 953 **41. Jung HS, Komatsu S, Ikebe M, Craig R. Head-head and head-tail interaction: A**  
954 **general mechanism for switching off myosin II activity in cells. Mol Biol Cell.**  
955 **2008;19(8):3234-42.**
- 956 **42. Hooijman P, Stewart MA, Cooke R. A new state of cardiac myosin with very slow**  
957 **ATP turnover: A potential cardioprotective mechanism in the heart. Biophys J.**  
958 **2011;100(8):1969-76.**

- 959 **43. Craig R, Padron R, Kendrick-Jones J. Structural changes accompanying**  
960 **phosphorylation of tarantula muscle myosin filaments. The Journal of Cell Biology.**  
961 **1987;105(3):1319-27.**
- 962 **44. Greenberg MJ, Kazimierczak K, Szczesna-Cordary D, Moore JR. Cardiomyopathy-**  
963 **linked myosin regulatory light chain mutations disrupt myosin strain-dependent**  
964 **biochemistry. Proc Natl Acad Sci USA. 2010;107(40):17403-8.**
- 965 **45. Olson TM, Karst ML, Whitby FG, Driscoll DJ. Myosin light chain mutation causes**  
966 **autosomal recessive cardiomyopathy with mid-cavitary hypertrophy and restrictive**  
967 **physiology. Circulation. 2002;105(20):2337-40.**
- 968
- 969
- 970

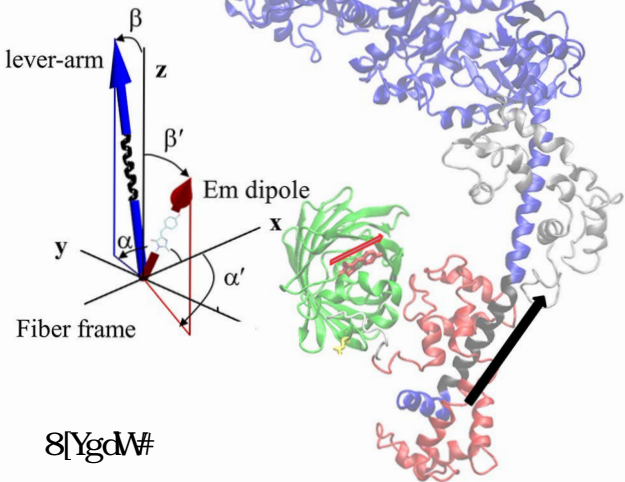

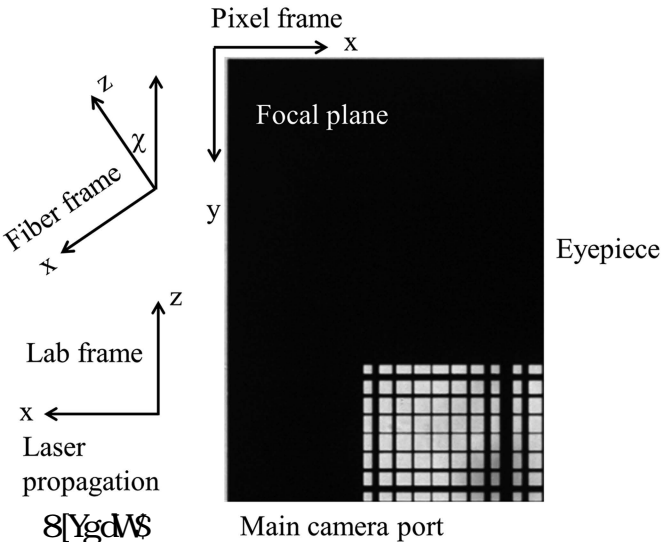

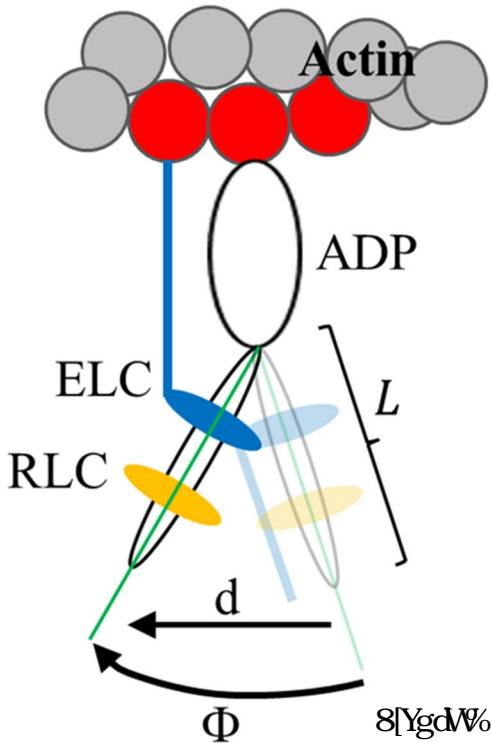

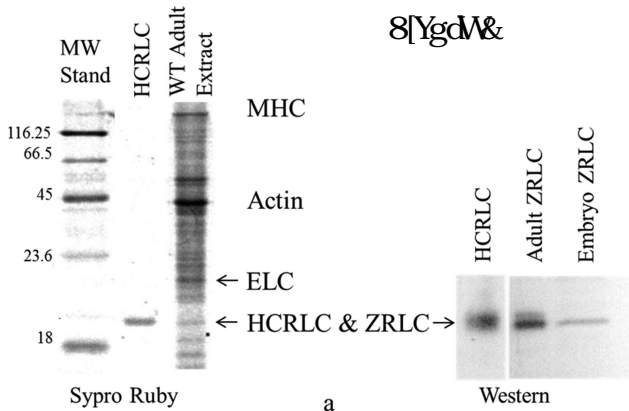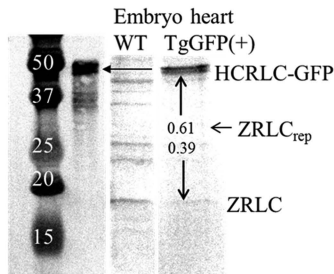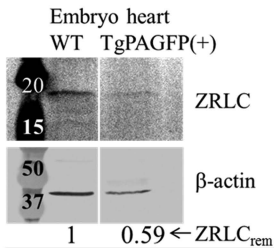**b****c**

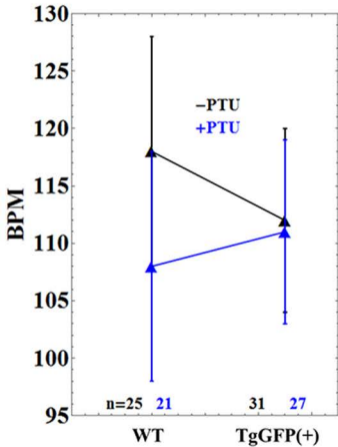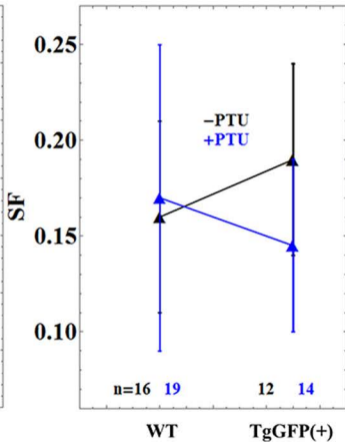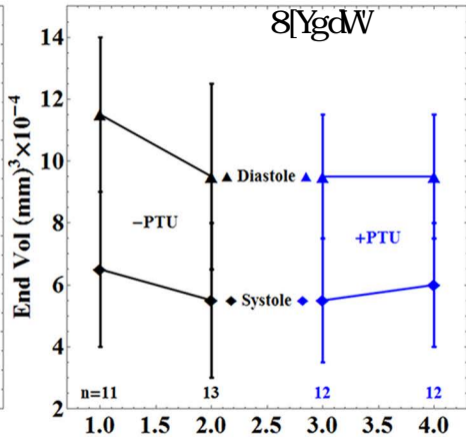

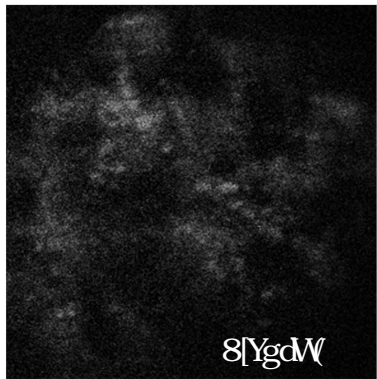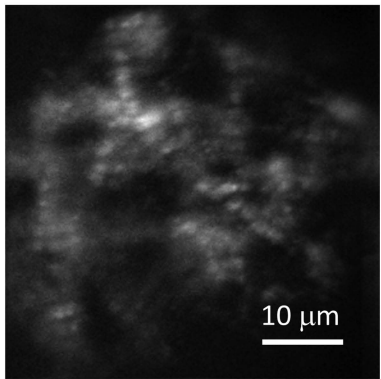



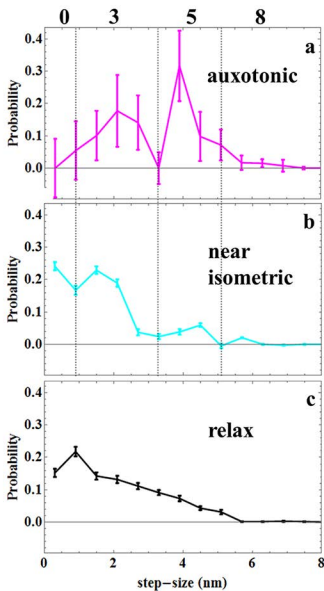

8[YgdW]

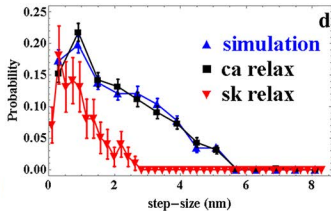

Figure 8

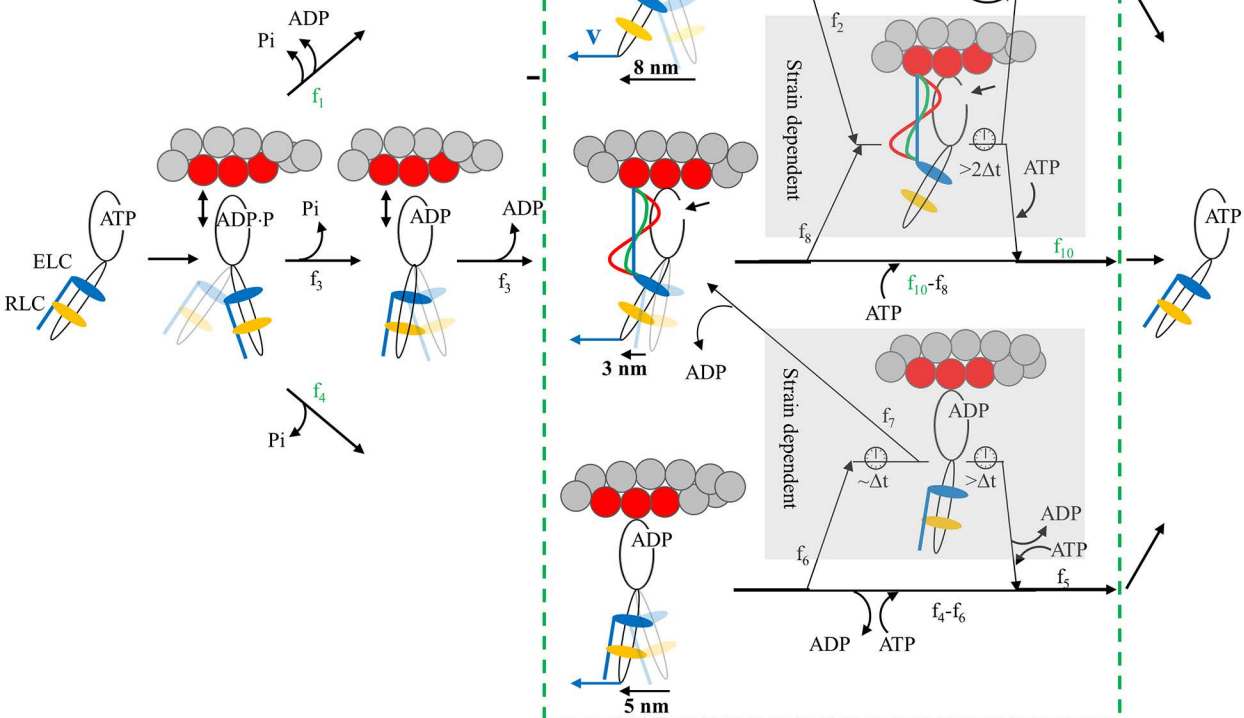

Supplement: Supplementary file [file 123166-1.pdf]
